# Supplementary material
Source: MDPI journal article supplement (https://www.mdpi.com/2073-4433/13/9/1371)
Supplement: s1 [file s1]

# Establishment of a Combined Model for Ozone Concentration Simulation with Stepwise Regression Analysis and Artificial Neural Network

Jie Yu, Lingxuan Xu, Shuang Gao, Li Chen, Yanling Sun, Jian Mao and Hui Zhang

**Table S1.** Performance of O<sub>3</sub> concentration simulation using SR and ANN models.

| City         | Model | Adjusted R <sup>2</sup> | RMSE  | MAE   |
|--------------|-------|-------------------------|-------|-------|
| Shijiazhuang | SR    | 0.7837                  | 28.62 | 21.90 |
|              | ANN   | 0.8619                  | 22.87 | 16.59 |
| Baoding      | SR    | 0.7442                  | 31.79 | 25.01 |
|              | ANN   | 0.8481                  | 24.50 | 18.16 |
| Cangzhou     | SR    | 0.7431                  | 27.54 | 21.80 |
|              | ANN   | 0.8199                  | 23.05 | 17.34 |
| Chengde      | SR    | 0.6541                  | 28.29 | 21.78 |
|              | ANN   | 0.8206                  | 20.37 | 15.12 |
| Handan       | SR    | 0.7779                  | 28.00 | 22.36 |
|              | ANN   | 0.8369                  | 23.99 | 18.37 |
| Hengshui     | SR    | 0.7566                  | 27.02 | 20.95 |
|              | ANN   | 0.8052                  | 24.17 | 18.13 |
| Langfang     | SR    | 0.7352                  | 29.80 | 23.42 |
|              | ANN   | 0.8366                  | 23.41 | 17.23 |
| Qinhuangdao  | SR    | 0.6429                  | 29.01 | 22.30 |
|              | ANN   | 0.7748                  | 23.04 | 16.53 |
| Tangshan     | SR    | 0.7176                  | 31.51 | 25.17 |
|              | ANN   | 0.8329                  | 24.23 | 18.61 |
| Xingtai      | SR    | 0.7842                  | 28.48 | 22.35 |
|              | ANN   | 0.8403                  | 24.50 | 18.51 |
| Zhangjiakou  | SR    | 0.7205                  | 22.09 | 16.42 |
|              | ANN   | 0.8268                  | 17.40 | 12.17 |

**Table S2.** Input parameters for ANN in Shijiazhuang, Baoding, Cangzhou, Chengde, Handan, Hengshui, Langfang, Qinhuangdao, Tangshan, Xingtai and Zhangjiakou.

| City         | Input parameters                                                                  |
|--------------|-----------------------------------------------------------------------------------|
| Shijiazhuang | T2M, SSR, WD, PM <sub>2.5</sub> , NO <sub>2</sub> , CO, WS                        |
| Baoding      | T2M, SSR, WD, PM <sub>2.5</sub> , NO <sub>2</sub> , CO                            |
| Cangzhou     | T2M, SSR, WD, PM <sub>2.5</sub> , NO <sub>2</sub> , CO                            |
| Chengde      | T2M, SSR, WD, PM <sub>2.5</sub> , NO <sub>2</sub> , BLH, WS, TP                   |
| Handan       | T2M, SSR, PM <sub>2.5</sub> , NO <sub>2</sub> , CO, SP                            |
| Hengshui     | T2M, SSR, WD, PM <sub>2.5</sub> , NO <sub>2</sub> , BLH, WS                       |
| Langfang     | T2M, SSR, WD, PM <sub>2.5</sub> , NO <sub>2</sub> , CO, BLH, WS                   |
| Qinhuangdao  | T2M, SSR, WD, PM <sub>2.5</sub> , NO <sub>2</sub> , BLH, WS, PM <sub>10</sub>     |
| Tangshan     | T2M, SSR, WD, PM <sub>2.5</sub> , NO <sub>2</sub>                                 |
| Xingtai      | T2M, SSR, WD, PM <sub>2.5</sub> , NO <sub>2</sub> , CO                            |
| Zhangjiakou  | T2M, SSR, WD, PM <sub>2.5</sub> , NO <sub>2</sub> , CO, WS, PM <sub>10</sub> , SP |

**Table S3.** Performance of ANN on O<sub>3</sub> concentration simulation with different network structures.

| City         | Activation function | Number of nodes(hidden) | Adjusted R <sup>2</sup> | RMSE  | MAE   |
|--------------|---------------------|-------------------------|-------------------------|-------|-------|
| Hengshui     | tanh                | 3                       | 0.8026                  | 24.33 | 18.21 |
|              |                     | 4                       | 0.8041                  | 24.24 | 18.25 |
|              |                     | 5                       | 0.8052                  | 24.17 | 18.12 |
|              | sigmoid             | 3                       | 0.7912                  | 25.03 | 18.73 |
|              |                     | 4                       | 0.7997                  | 24.51 | 18.44 |
|              |                     | 5                       | 0.8002                  | 24.48 | 18.28 |
| Langfang     | tanh                | 3                       | 0.8279                  | 24.02 | 17.35 |
|              |                     | 4                       | 0.8284                  | 23.99 | 17.47 |
|              |                     | 5                       | 0.8366                  | 23.41 | 17.23 |
|              | sigmoid             | 3                       | 0.8211                  | 24.49 | 18.03 |
|              |                     | 4                       | 0.8376                  | 23.34 | 17.02 |
|              |                     | 5                       | 0.8297                  | 23.90 | 17.67 |
| Qinhuangdao  | tanh                | 3                       | 0.7463                  | 24.45 | 17.73 |
|              |                     | 4                       | 0.7749                  | 23.03 | 17.03 |
|              |                     | 5                       | 0.7752                  | 23.04 | 16.53 |
|              | sigmoid             | 3                       | 0.7465                  | 24.44 | 18.36 |
|              |                     | 4                       | 0.7621                  | 23.68 | 17.11 |
|              |                     | 5                       | 0.7637                  | 23.60 | 16.95 |
| Tangshan     | tanh                | 3                       | 0.8269                  | 24.67 | 18.74 |
|              |                     | 4                       | 0.8333                  | 24.21 | 18.20 |
|              |                     | 5                       | 0.8330                  | 24.23 | 18.62 |
|              | sigmoid             | 3                       | 0.8191                  | 25.22 | 19.27 |
|              |                     | 4                       | 0.8245                  | 24.84 | 18.77 |
|              |                     | 5                       | 0.8203                  | 25.14 | 18.85 |
| Xingtai      | tanh                | 3                       | 0.8356                  | 24.86 | 18.93 |
|              |                     | 4                       | 0.8458                  | 24.08 | 17.99 |
|              |                     | 5                       | 0.8403                  | 24.50 | 18.51 |
|              | sigmoid             | 3                       | 0.8376                  | 24.70 | 18.77 |
|              |                     | 4                       | 0.8385                  | 24.64 | 18.72 |
|              |                     | 5                       | 0.8366                  | 24.78 | 18.81 |
| Zhangjiakou  | tanh                | 3                       | 0.8092                  | 18.25 | 13.14 |
|              |                     | 4                       | 0.8308                  | 17.19 | 12.32 |
|              |                     | 5                       | 0.8268                  | 17.40 | 12.17 |
|              | sigmoid             | 3                       | 0.8076                  | 18.33 | 13.14 |
|              |                     | 4                       | 0.8157                  | 17.94 | 13.02 |
|              |                     | 5                       | 0.8214                  | 17.66 | 12.40 |
| Shijiazhuang | tanh                | 3                       | 0.8513                  | 23.73 | 17.24 |
|              |                     | 4                       | 0.8541                  | 23.51 | 17.08 |
|              |                     | 5                       | 0.8619                  | 22.87 | 16.59 |
|              | sigmoid             | 3                       | 0.8512                  | 23.74 | 17.20 |
|              |                     | 4                       | 0.8498                  | 23.85 | 17.49 |
|              |                     | 5                       | 0.8535                  | 23.56 | 17.27 |
| Baoding      | tanh                | 3                       | 0.8252                  | 26.28 | 19.44 |
|              |                     | 4                       | 0.8352                  | 25.51 | 18.81 |
|              |                     | 5                       | 0.8481                  | 24.50 | 18.16 |
|              | sigmoid             | 3                       | 0.8286                  | 26.02 | 19.38 |
|              |                     | 4                       | 0.8200                  | 26.66 | 20.17 |

|          |         |         |        |       |        |       |       |
|----------|---------|---------|--------|-------|--------|-------|-------|
| Cangzhou | tanh    | 5       | 0.8433 | 24.88 | 18.40  |       |       |
|          |         | 3       | 0.8040 | 24.05 | 18.20  |       |       |
|          |         | 4       | 0.8143 | 23.41 | 17.47  |       |       |
|          |         | 5       | 0.8199 | 23.05 | 17.34  |       |       |
|          | sigmoid | 3       | 0.8033 | 24.09 | 18.25  |       |       |
|          |         | 4       | 0.8115 | 23.59 | 17.77  |       |       |
|          |         | 5       | 0.8121 | 23.55 | 17.94  |       |       |
|          |         | Chengde | tanh   | 3     | 0.8077 | 21.09 | 15.38 |
| 4        | 0.8352  |         |        | 19.53 | 13.98  |       |       |
| 5        | 0.8198  |         |        | 20.37 | 15.12  |       |       |
| 3        | 0.7991  |         |        | 21.56 | 15.74  |       |       |
| sigmoid  | 4       |         | 0.8118 | 20.87 | 15.29  |       |       |
|          | 5       |         | 0.8028 | 21.37 | 15.42  |       |       |
|          | Handan  |         | tanh   | 3     | 0.8345 | 24.17 | 18.59 |
|          |         |         |        | 4     | 0.8364 | 24.03 | 18.61 |
| 5        |         | 0.8370  |        | 23.99 | 18.38  |       |       |
| 3        |         | 0.8265  |        | 24.74 | 19.19  |       |       |
| sigmoid  |         | 4       | 0.8286 | 24.60 | 19.08  |       |       |
|          |         | 5       | 0.8337 | 24.23 | 18.79  |       |       |

**Table S4.** Performance of ANN on O3 concentration simulation in different seasons using the optimal network structure.

| City         | Season | Adjusted R <sup>2</sup> | RMSE  | MAE   |
|--------------|--------|-------------------------|-------|-------|
| Shijiazhuang | spring | 0.6835                  | 21.72 | 15.74 |
|              | summer | 0.6862                  | 27.38 | 21.09 |
|              | autumn | 0.8368                  | 19.80 | 14.31 |
|              | winter | 0.7564                  | 12.95 | 9.48  |
| Baoding      | spring | 0.7880                  | 20.59 | 15.51 |
|              | summer | 0.5974                  | 31.77 | 25.51 |
|              | autumn | 0.8504                  | 19.60 | 14.91 |
|              | winter | 0.7845                  | 12.73 | 9.57  |
| Cangzhou     | spring | 0.6995                  | 20.91 | 15.66 |
|              | summer | 0.5712                  | 30.30 | 24.21 |
|              | autumn | 0.7713                  | 20.76 | 14.65 |
|              | winter | 0.6352                  | 14.27 | 10.82 |
| Chengde      | spring | 0.8084                  | 16.29 | 12.46 |
|              | summer | 0.6847                  | 24.86 | 19.35 |
|              | autumn | 0.7956                  | 16.50 | 11.79 |
|              | winter | 0.8748                  | 7.68  | 5.92  |
| Handan       | spring | 0.7210                  | 19.94 | 15.47 |
|              | summer | 0.6298                  | 28.68 | 22.93 |
|              | autumn | 0.7987                  | 22.84 | 16.92 |
|              | winter | 0.6276                  | 17.29 | 13.26 |
| Hengshui     | spring | 0.6597                  | 21.92 | 16.79 |
|              | summer | 0.5569                  | 29.33 | 21.67 |
|              | autumn | 0.7155                  | 24.05 | 17.35 |
|              | winter | 0.7277                  | 14.09 | 10.46 |
| Langfang     | spring | 0.7416                  | 22.67 | 16.57 |
|              | summer | 0.6408                  | 29.19 | 22.33 |
|              | autumn | 0.8131                  | 20.18 | 14.65 |

|             |        |        |       |       |
|-------------|--------|--------|-------|-------|
| Qinhuangdao | winter | 0.7798 | 11.29 | 8.35  |
|             | spring | 0.7308 | 18.89 | 14.70 |
|             | summer | 0.4599 | 33.84 | 25.51 |
|             | autumn | 0.8018 | 18.28 | 12.54 |
| Tangshan    | winter | 0.7444 | 9.11  | 6.69  |
|             | spring | 0.7545 | 22.14 | 16.90 |
|             | summer | 0.5961 | 34.42 | 27.56 |
|             | autumn | 0.8438 | 18.68 | 13.75 |
| Xingtai     | winter | 0.7642 | 10.12 | 7.98  |
|             | spring | 0.7494 | 19.14 | 14.66 |
|             | summer | 0.6229 | 29.80 | 22.87 |
|             | autumn | 0.7472 | 24.86 | 18.63 |
| Zhangjiakou | winter | 0.6005 | 17.56 | 13.18 |
|             | spring | 0.7095 | 17.27 | 11.93 |
|             | summer | 0.7165 | 19.61 | 15.29 |
|             | autumn | 0.7860 | 13.85 | 10.29 |
|             | winter | 0.7224 | 8.36  | 6.38  |

**Table S5.** Prediction performance using SR and ANN models.

| City/Province | Model | POD    | TS     | FAR    |
|---------------|-------|--------|--------|--------|
| Shijiazhuang  | SR    | 0.7234 | 0.5842 | 0.2478 |
|               | ANN   | 0.7957 | 0.6727 | 0.1870 |
| Baoding       | SR    | 0.7080 | 0.5710 | 0.2532 |
|               | ANN   | 0.7560 | 0.6517 | 0.1747 |
| Cangzhou      | SR    | 0.6250 | 0.4874 | 0.3112 |
|               | ANN   | 0.7222 | 0.5865 | 0.2427 |
| Chengde       | SR    | 0.3250 | 0.3071 | 0.1522 |
|               | ANN   | 0.7000 | 0.5563 | 0.2696 |
| Handan        | SR    | 0.7531 | 0.5607 | 0.3130 |
|               | ANN   | 0.8075 | 0.6433 | 0.2402 |
| Hengshui      | SR    | 0.6835 | 0.5438 | 0.2732 |
|               | ANN   | 0.7798 | 0.6028 | 0.2735 |
| Langfang      | SR    | 0.6651 | 0.5909 | 0.1588 |
|               | ANN   | 0.8093 | 0.7045 | 0.1553 |
| Qinhuangdao   | SR    | 0.2443 | 0.2238 | 0.2727 |
|               | ANN   | 0.6183 | 0.5294 | 0.2136 |
| Tangshan      | SR    | 0.5742 | 0.4819 | 0.2500 |
|               | ANN   | 0.7177 | 0.6224 | 0.1758 |
| Xingtai       | SR    | 0.7613 | 0.5987 | 0.2629 |
|               | ANN   | 0.8025 | 0.6655 | 0.2041 |
| Zhangjiakou   | SR    | 0.3780 | 0.3529 | 0.1579 |
|               | ANN   | 0.6378 | 0.5294 | 0.2430 |

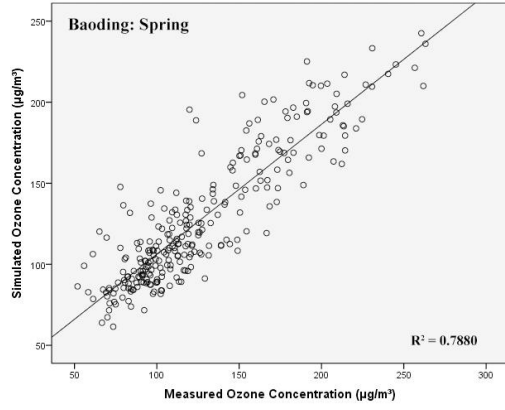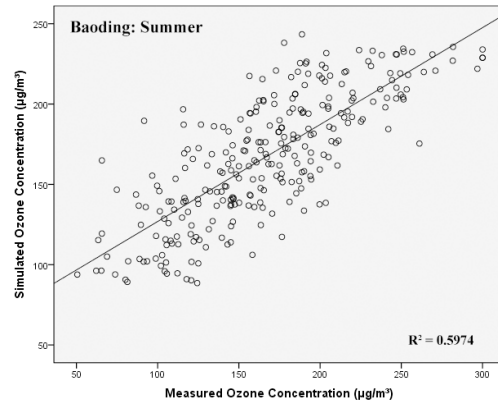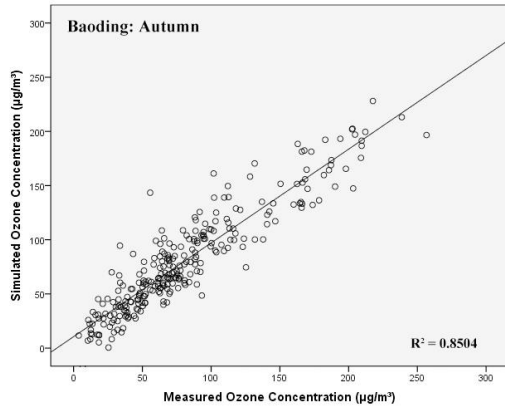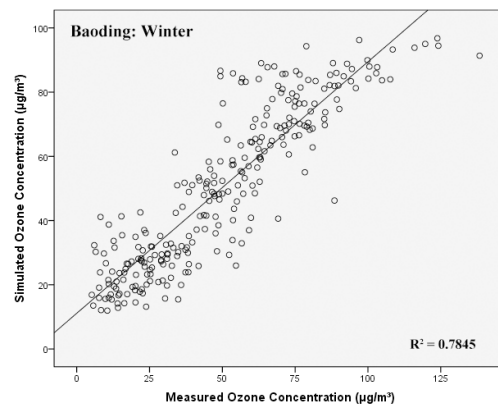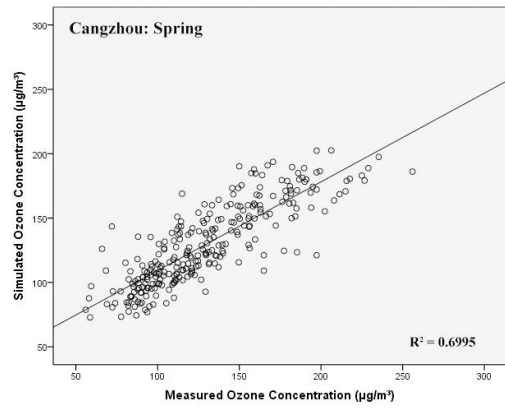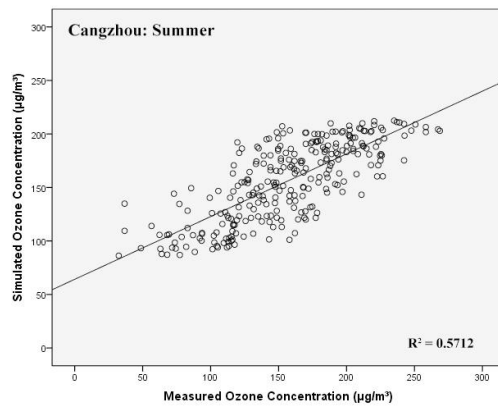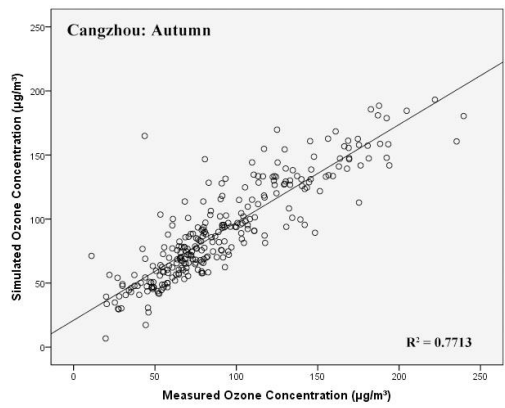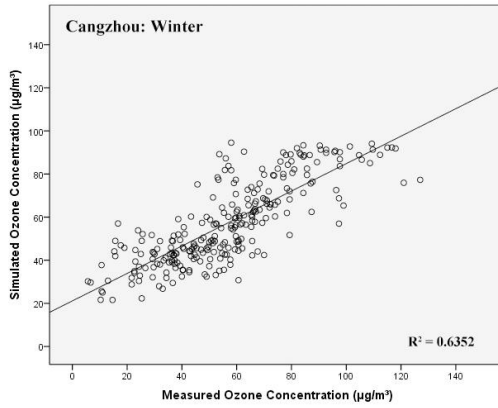

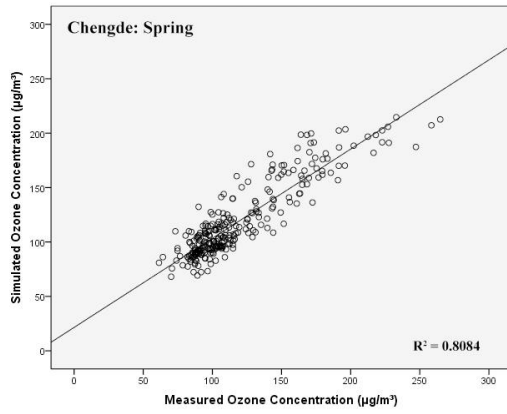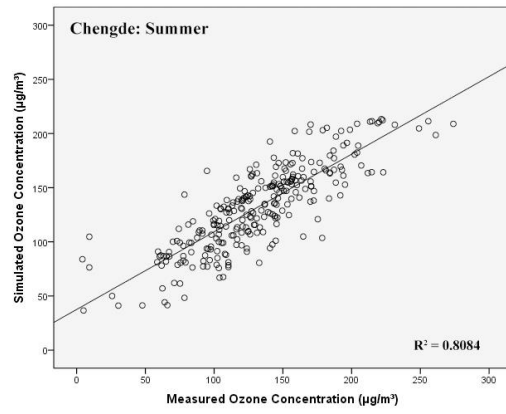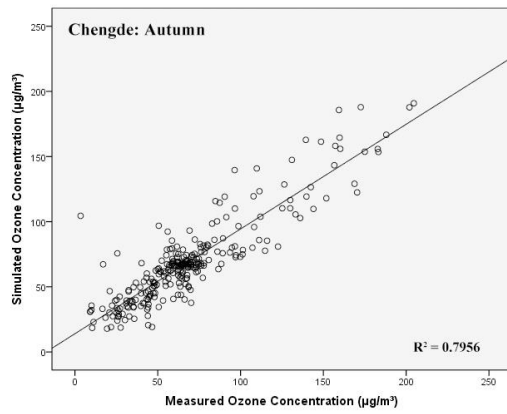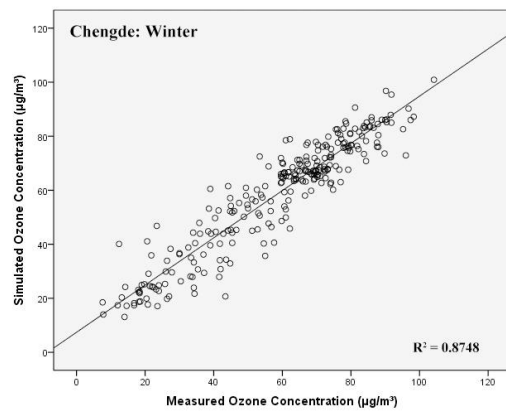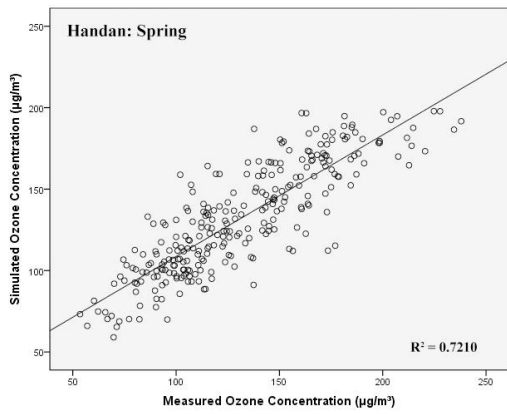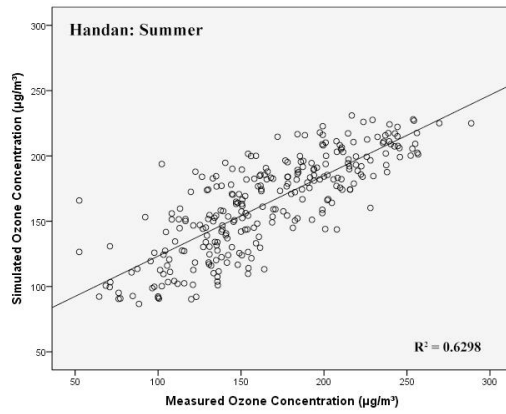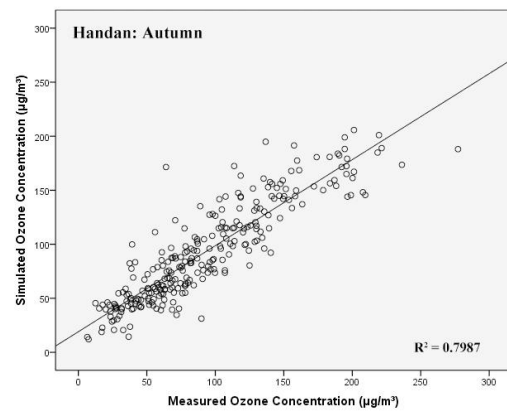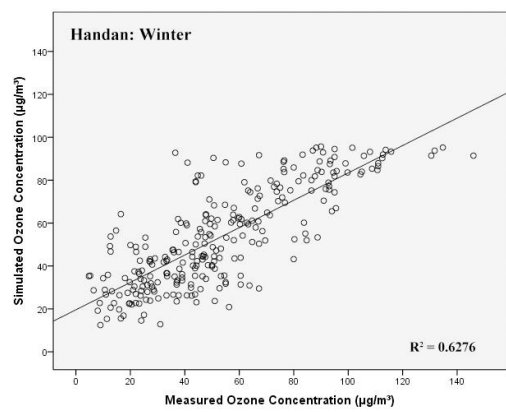

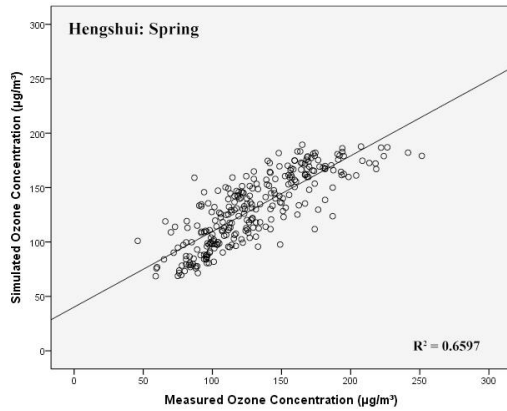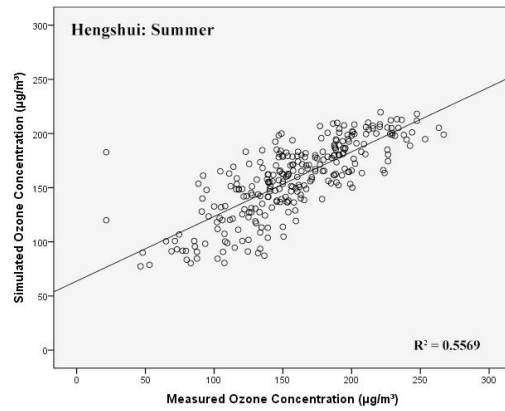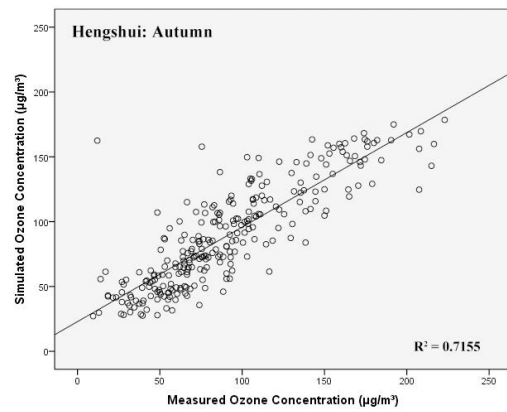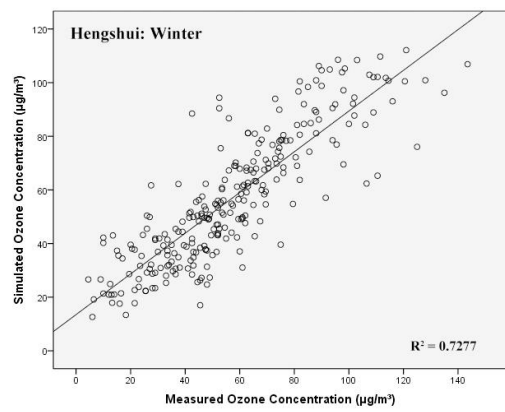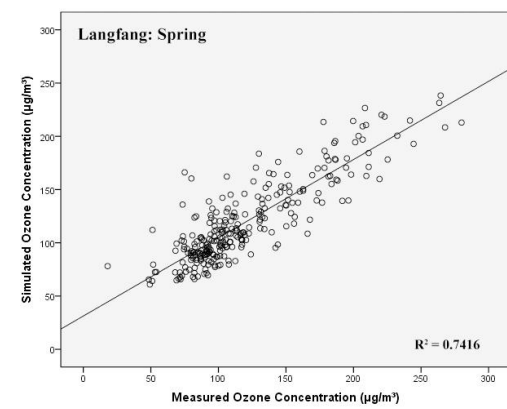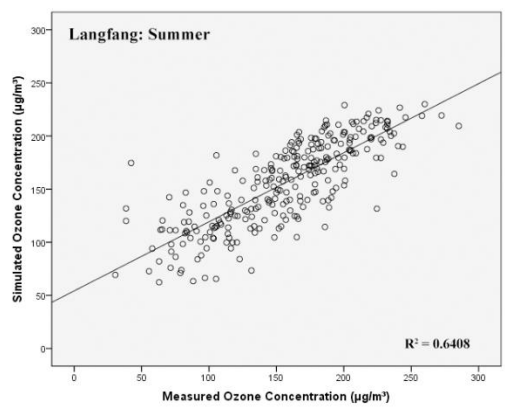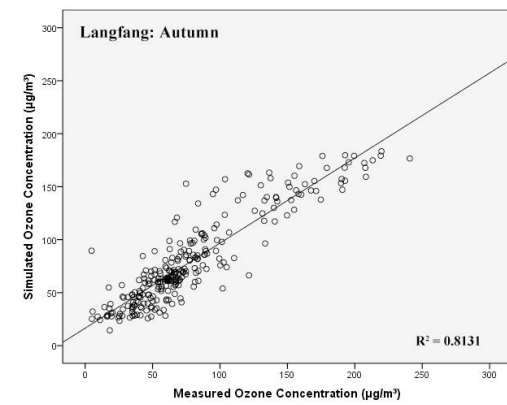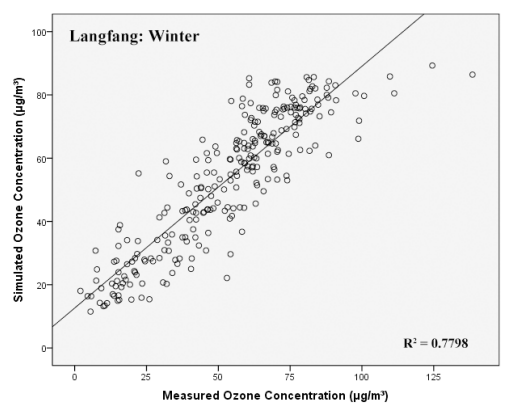

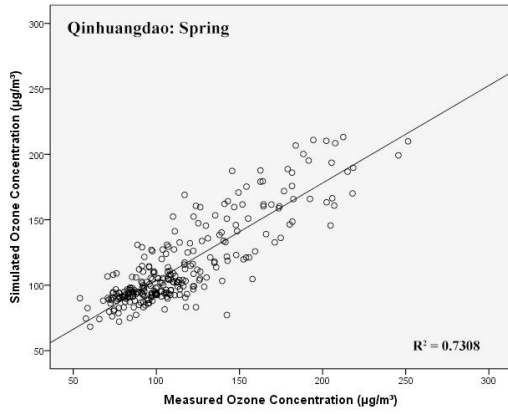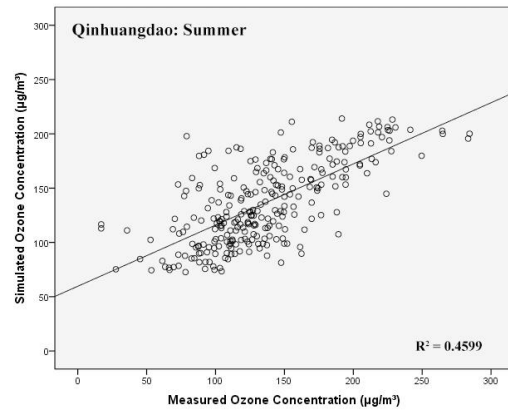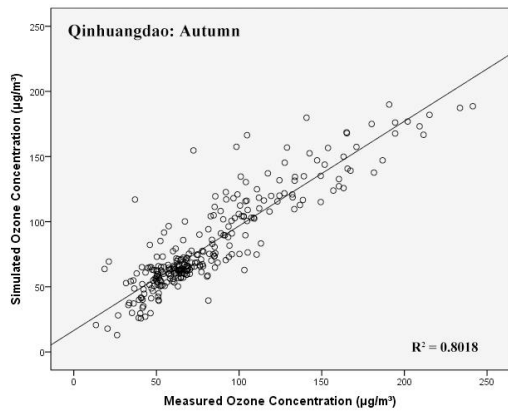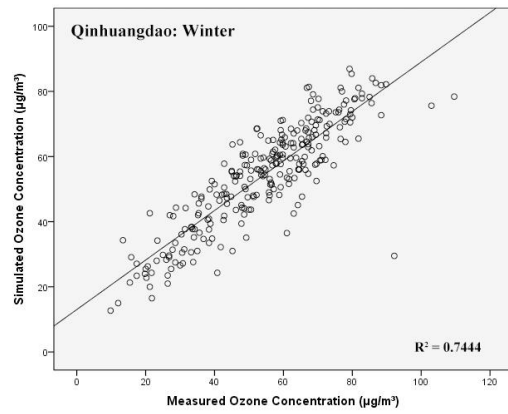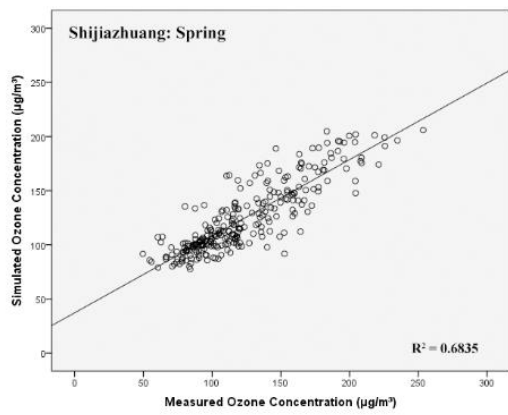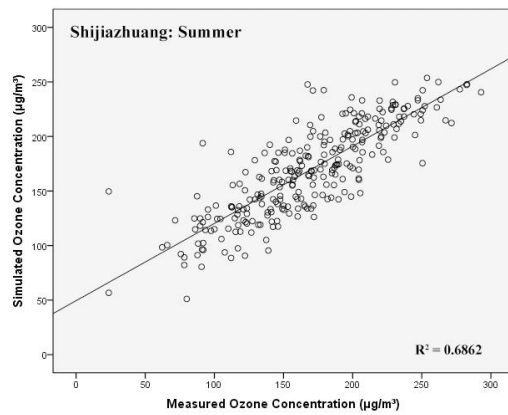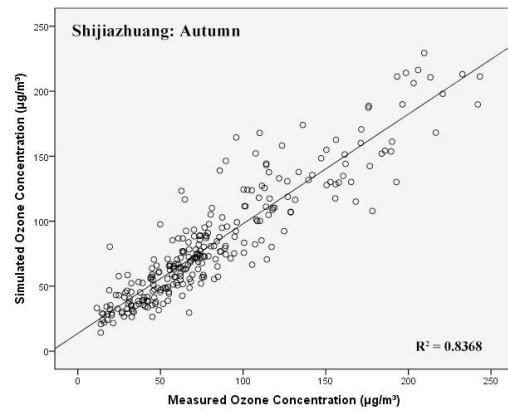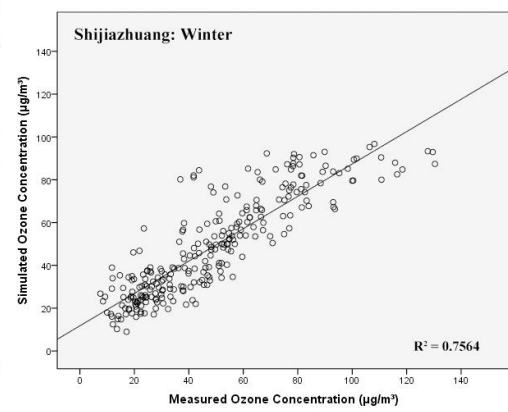



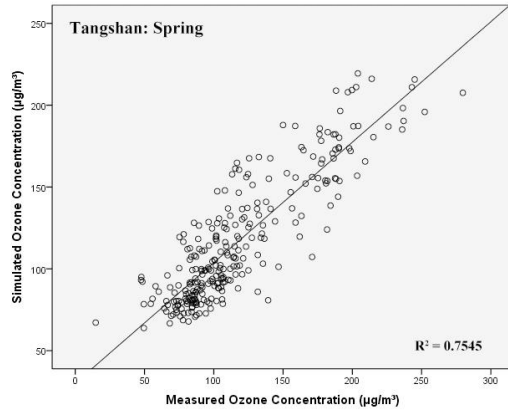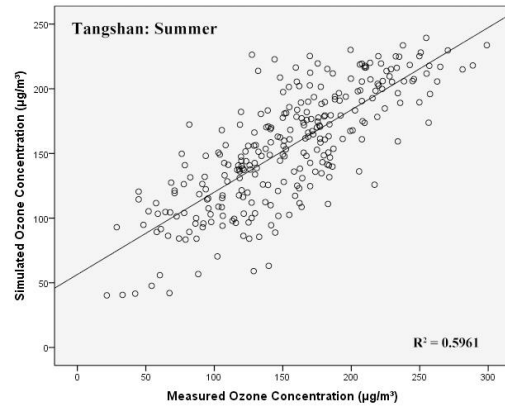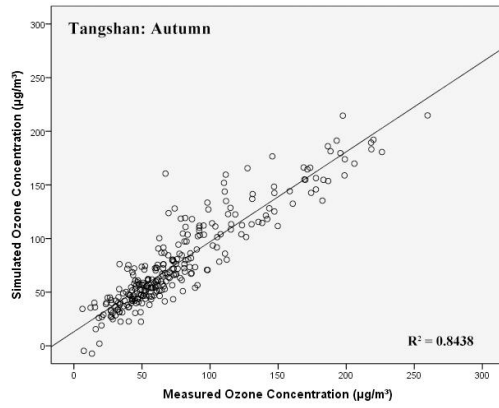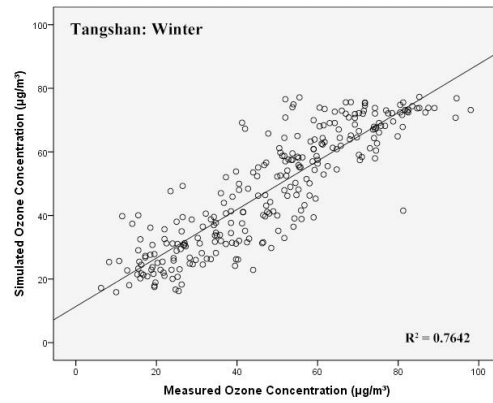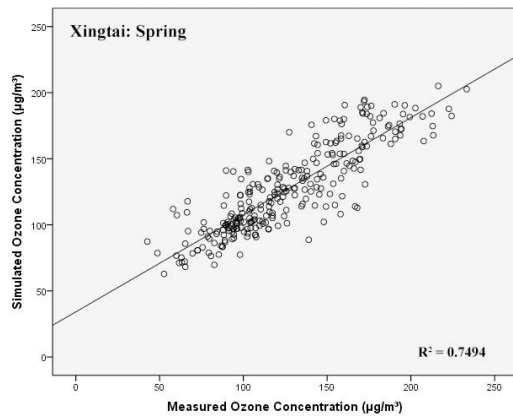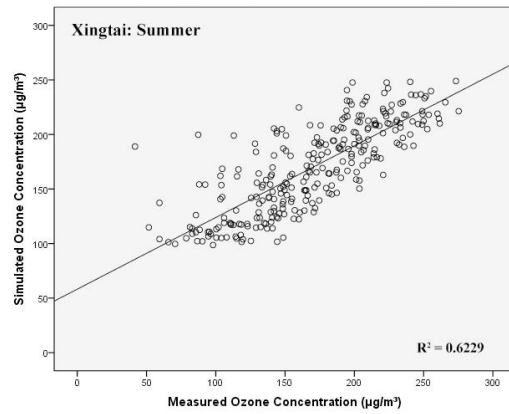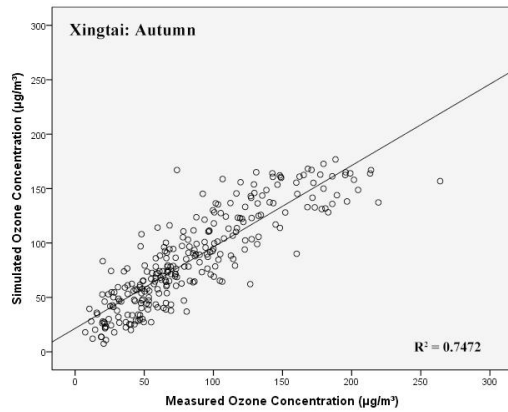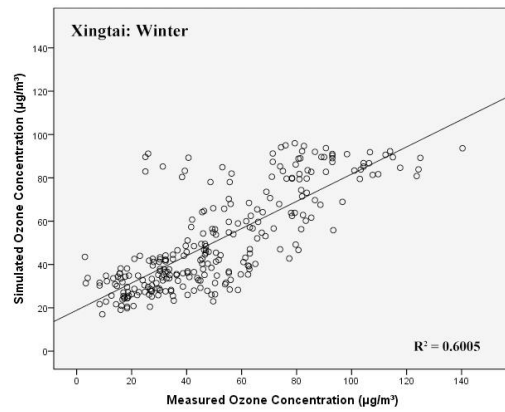

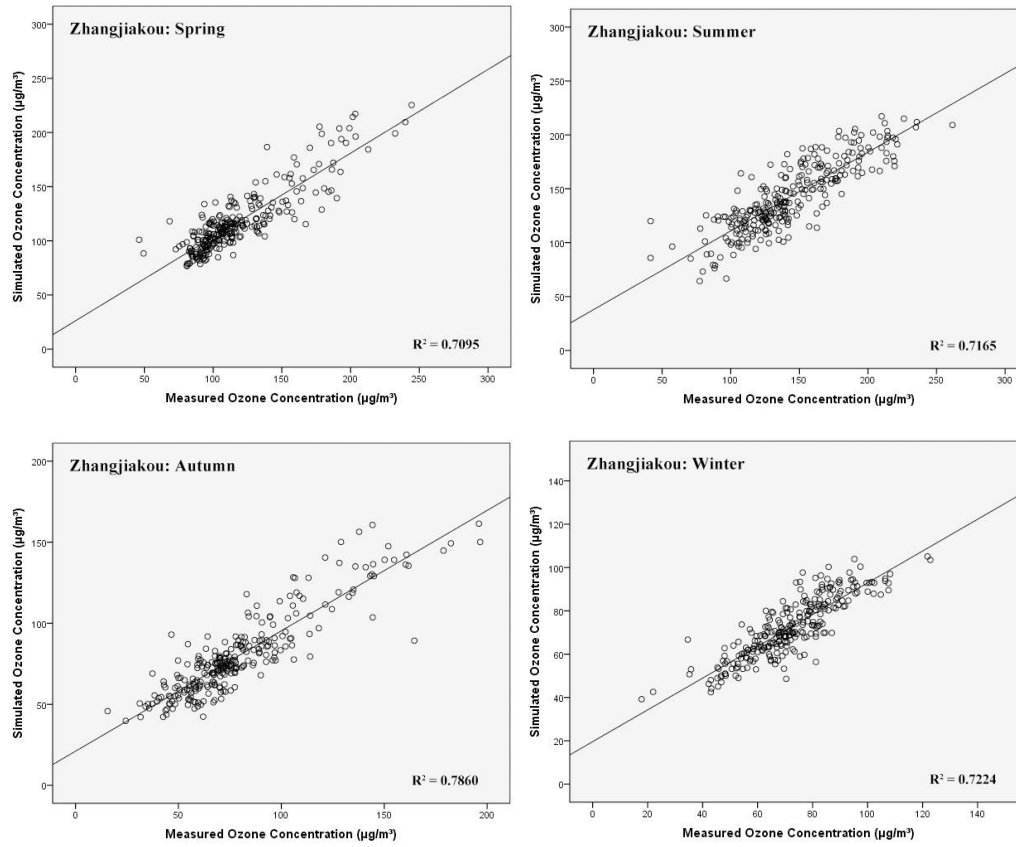

**Figure S1.** Relationship between the simulated value of  $\text{O}_3\_8\text{h}$  and the actual monitored concentration of  $\text{O}_3\_8\text{h}$  in each season based on the neural network model with activation function of tanh.
